# Supplementary material
Source: PubMed Central journal article supplement (PMC7610352)

Extended Data Fig. 2e

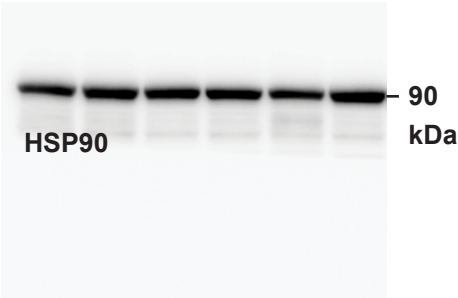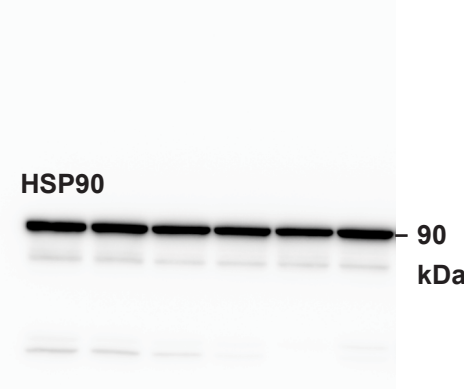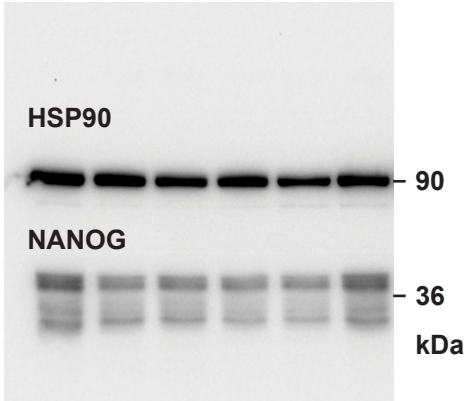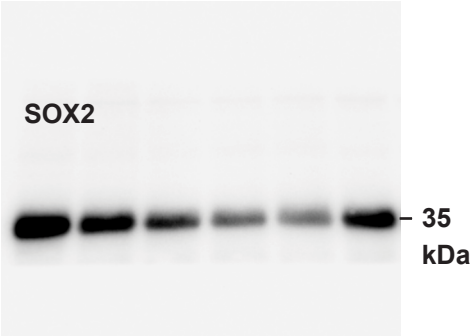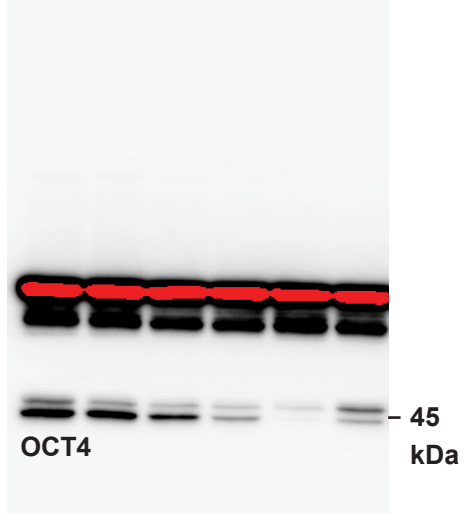

Supplement: EMS118022-supplement-Source_Data_Extended_Data_Fig_2.pdf [file EMS118022-supplement-Source_Data_Extended_Data_Fig_2.pdf]

Extended Data Fig. 9e

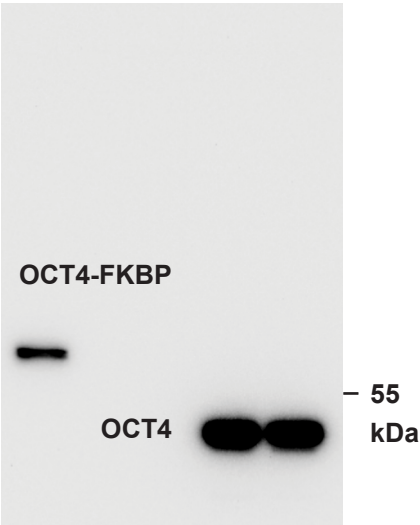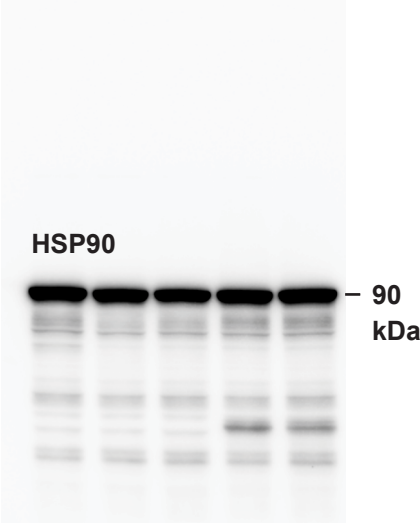

Supplement: EMS118022-supplement-Source_Data_Extended_Data_Fig_9.pdf [file EMS118022-supplement-Source_Data_Extended_Data_Fig_9.pdf]

**Figure 1b**

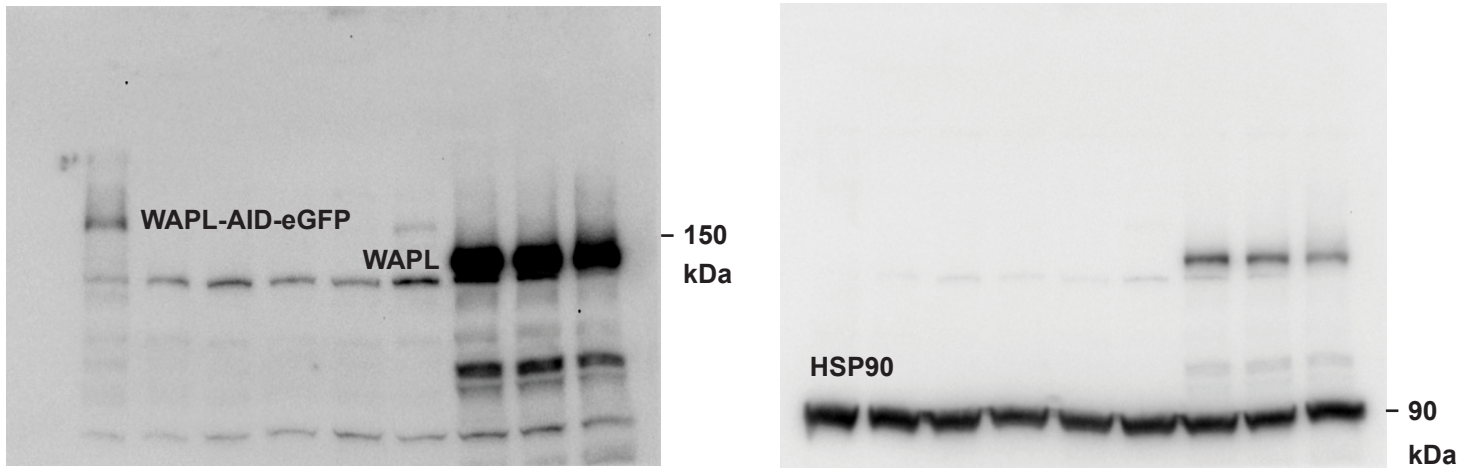

Supplement: EMS118022-supplement-Source_Data_Fig_1.pdf [file EMS118022-supplement-Source_Data_Fig_1.pdf]

**Figure 3b**

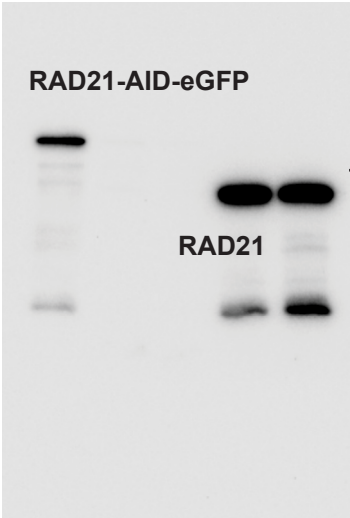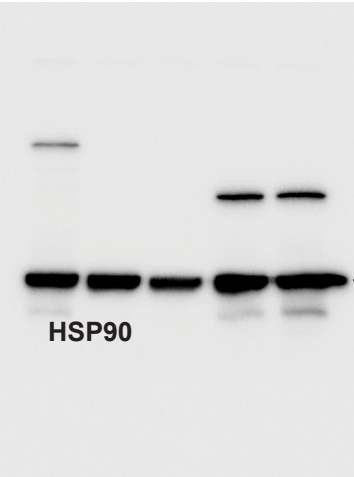

Supplement: EMS118022-supplement-Source_Data_Fig_3.pdf [file EMS118022-supplement-Source_Data_Fig_3.pdf]

**Figure 4d**

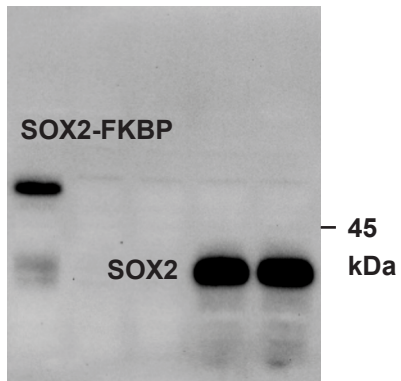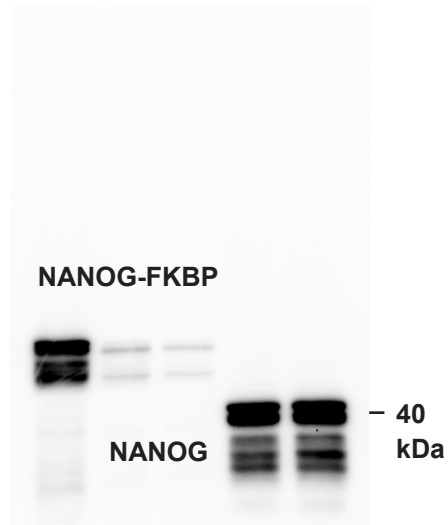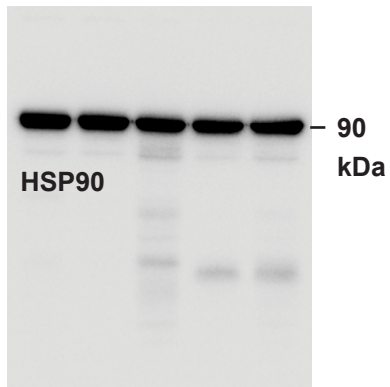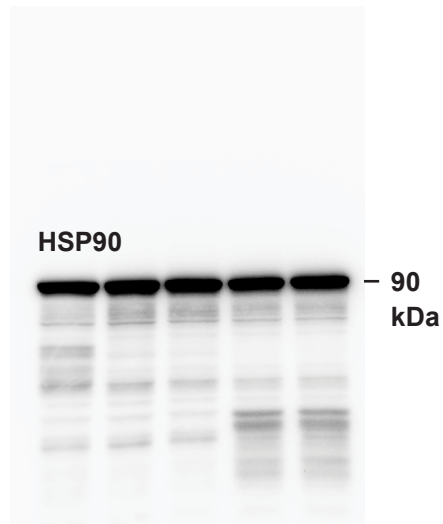

Supplement: EMS118022-supplement-Source_Data_Fig_4.pdf [file EMS118022-supplement-Source_Data_Fig_4.pdf]
